# Supplementary material for: Self-supported MOF/cellulose-nanocrystals materials designed from ultrafiltration
Source: Royal Society of Chemistry journal article supplement (doi:10.1039/d3sm00798g), 2023-01-01
Supplement: d3sm00798g5.pdf [file d3sm00798g5.pdf]

# Self-supported MOF/Cellulose-nanocrystals materials designed from ultrafiltration

Lorenzo Metilli<sup>1</sup>, Héloïse Ugo<sup>2</sup>, William Chèvremont<sup>3</sup>, Cyril Picard<sup>2</sup> and Frédéric Pignon<sup>1</sup>

<sup>1</sup>Univ. Grenoble Alpes, CNRS, Grenoble INP (Institute of Engineering Univ. Grenoble Alpes), LRP, 38000 Grenoble, France

<sup>2</sup>Univ. Grenoble Alpes, CNRS, LIPhy (Laboratoire Interdisciplinaire de Physique), Université Grenoble Alpes, 38000 Grenoble, France

<sup>3</sup>ESRF, The European Synchrotron, 38043 Grenoble, France

lorenzo.metilli@univ-grenoble-alpes.fr

## Supporting Information

The CNC suspensions were prepared by mixing and sonication, transferred into quartz capillaries and analysed at ESRF beamline TRUSAXS with a sample-detector distance (SDD) of 1.5 and 10 metres. The azimuthally-averaged scattering intensity of a diluted sample (0.14 wt. %) was fitted with a parallelepiped model, using the software Sasview (Figure S1a). Due to the limited q-range available, it was not possible to determine the length of the CNC; the value was therefore set to 120 nm, which was the average length measured from the TEM images of the samples. The width and height of the CNC was estimated to be 3.4 nm and 16.2 nm, respectively.

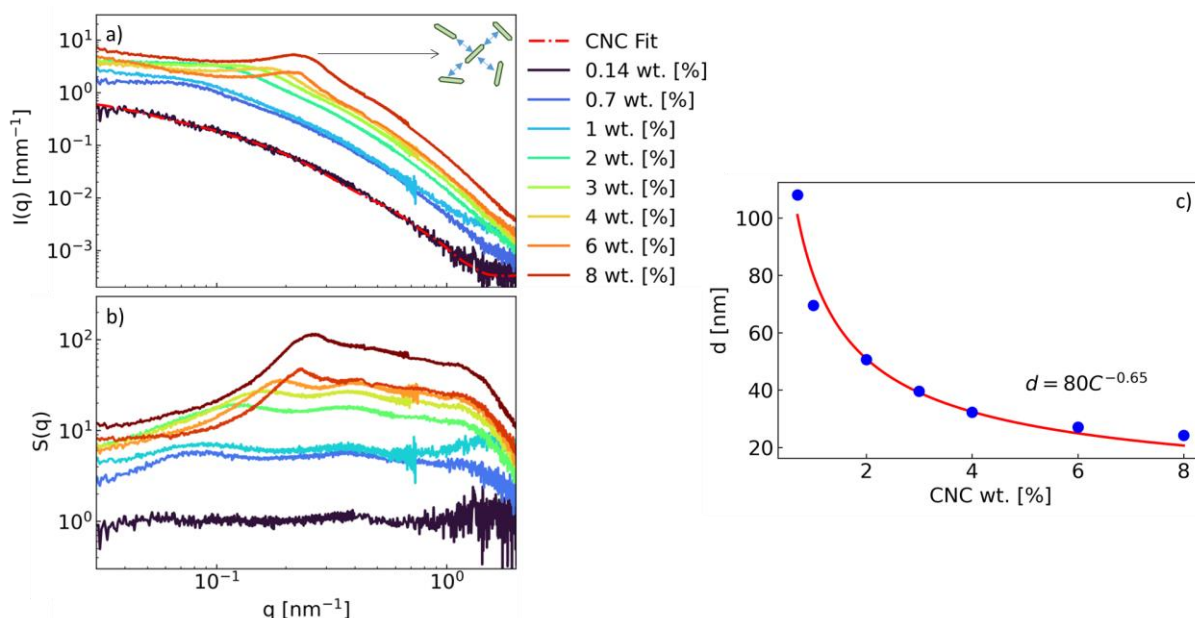

Figure S1. (a) Azimuthally-averaged scattering intensity of CNC suspensions at different weight concentrations, (b) corresponding structure factors obtained by dividing by the form factor  $F(q)$  and (c) interparticle distance peak as a function of concentration, fitted by a single-decay exponential.

The colloidal stability of ZIF-8 suspension with and without CNC was investigated macroscopically by pouring 20 mL of the suspensions in glass test tubes, and observing its evolution over time (Figure S2).

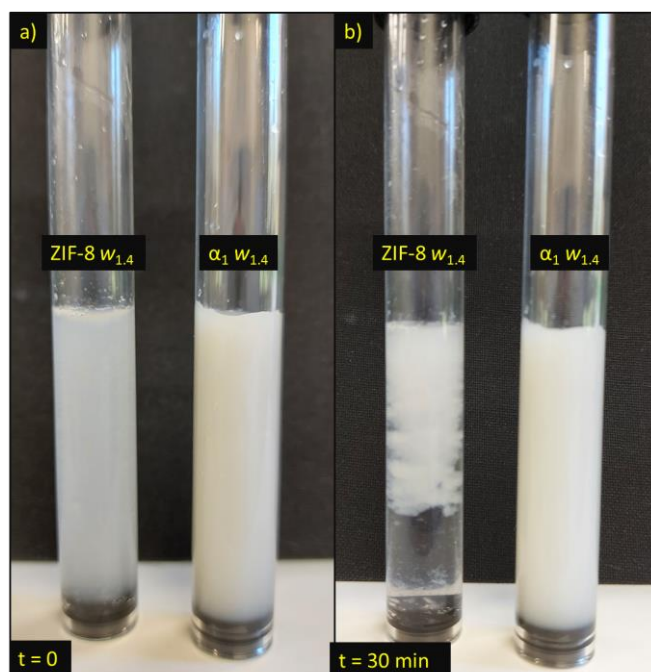

25

26 *Figure S2. Photographs showing the stability to phase separation (creaming, in this case) of an aqueous ZIF-8 suspension at*  
 27 *1.4 mass fraction, compared to an  $\alpha_1 w_{1.4}$  suspension (1:1 CNC:ZIF-8 volume ratio) after 30 minutes from mixing. When not*  
 28 *mixed with CNCs, the ZIF-8 particles start aggregating, flocculating to visible, millimetric aggregates, eventually rising to the*  
 29 *surface of the suspension. Instead, after addition and sonication of CNCs, the suspension remains homogeneous.*

30 The crystalline nature of ZIF-8 was assessed using Wide Angle X-Ray Scattering (WAXS) at TRUSAXS  
 31 (ESRF, Grenoble). The scattering pattern was compared with the one reported by Almasoudi & Mokaya,  
 32 (2012), which represents the same ZIF-8 product (Basolite Z1200®)

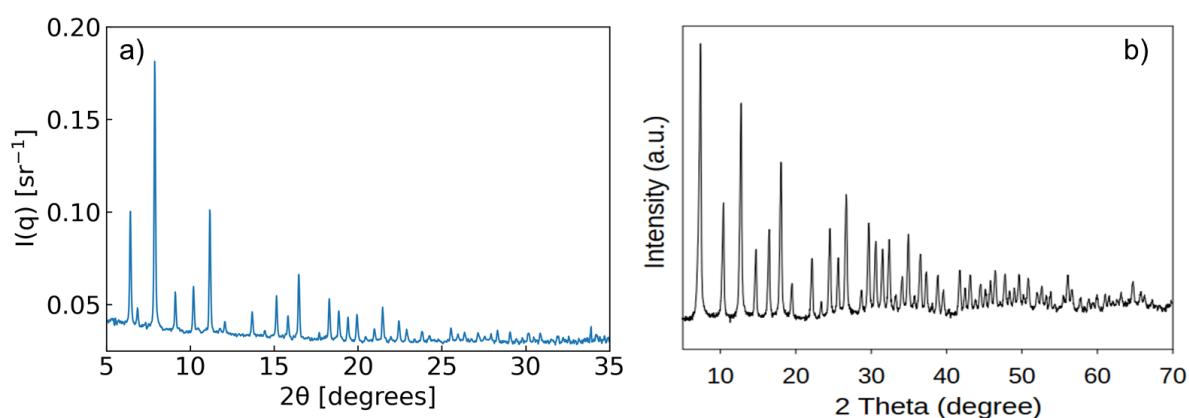

33

34 *Figure S3. WAXS pattern of Basolite Z1200® ZIF-8 powder used in this work (a) compared with the one reported in literature*  
 35 *by Almasoudi & Mokaya (2012) (b), adapted with from Almasoudi & Mokaya (2012) with permission from the Royal Society*  
 36 *of Chemistry.*

37 The sonication of ZIF-8 particles was carried out using a 100% duty cycle, maximum power level. The  
 38 particle size distribution was measured with laser diffraction every 60 seconds (Figure S4).

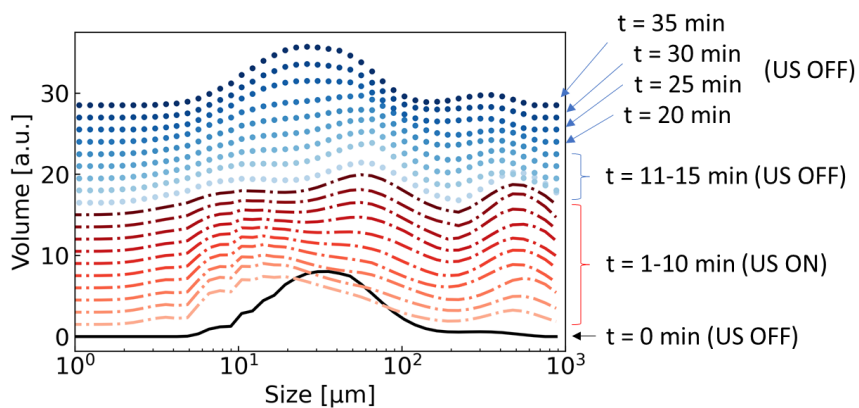

39

40 *Figure S4. Particle size distribution of a ZIF-8 aqueous suspension during sonication, measured by laser scattering. The black*  
 41 *curve is the suspension at rest (t=0), red curves are measured while sonicating (t = 1-10 min) and the dotted blue curves are*  
 42 *measured during relaxation (t = 11 – 35 min). Volume % are shifted on the y axis for clarity.*

43 The TEM images of CNCs were analysed using ImageJ 1.52t, using the “measure” function (Figure S5),  
 44 in order to obtain an estimate of the size of CNCs.

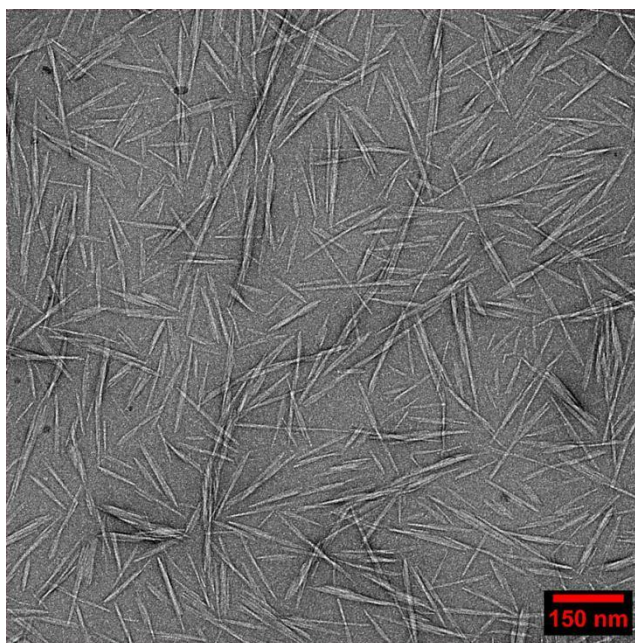

45

46

*Figure S5. TEM image of an aqueous suspension of sonicated CNCs.*

47

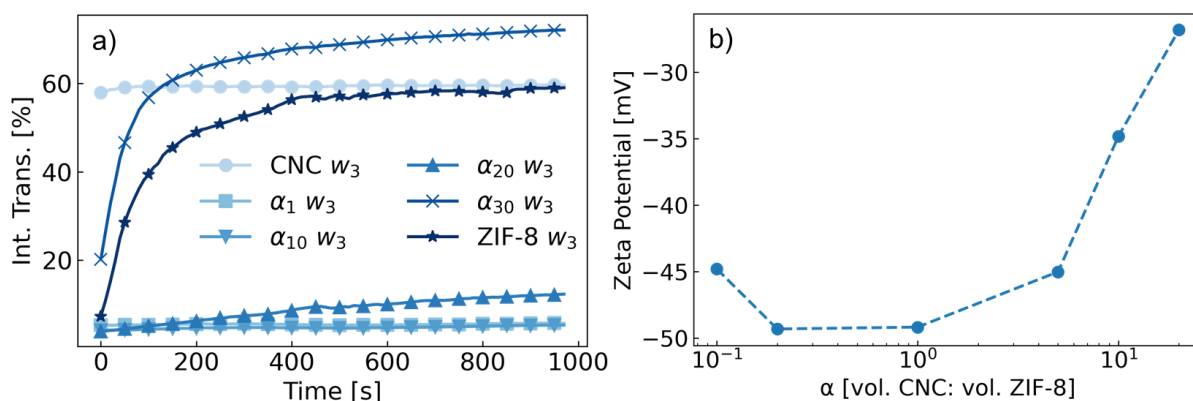

48  
49 *Figure S6. a) Evolution of the light transmission during centrifugation at 250 rpm and (b) zeta potential of samples with*  
50 *different  $\alpha$  values.*

51 The particle size measurements, obtained by static light scattering, showed that the physical mixing of  
52 CNC with ZIF-8 was not effective in decreasing the mean ZIF-8 aggregate size. On the other hand, the  
53 sonication process allowed the reduction of the particles' aggregate size from *ca.* 40  $\mu\text{m}$  to 20  $\mu\text{m}$ .  
54 Furthermore, within the explored  $\alpha$  values range, the quantity of CNCs did not affect the final size  
55 distribution of the ZIF-8 aggregates during sonication (Figure S7b).

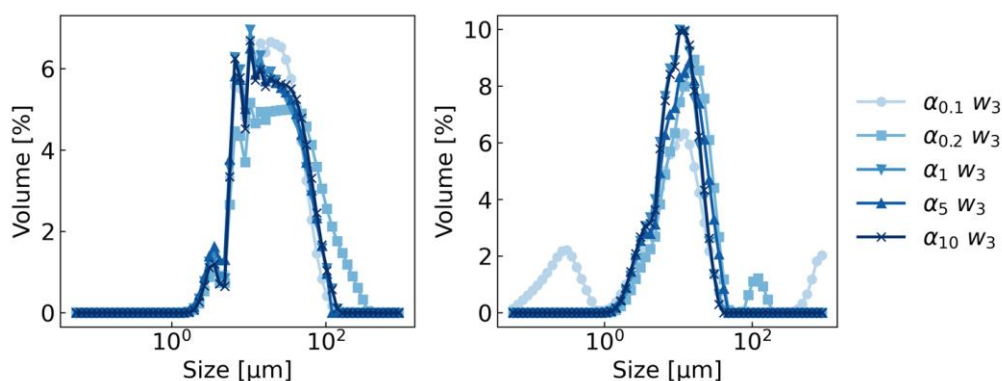

56  
57 *Figure S7. Size distribution of ZIF-8:CNC aggregates, measured by static light scattering, with different  $\alpha$  values, after mixing*  
58 *for 1 hour (a) and after sonication for 15 minutes (b).*

59 The rheological data collected during shear flow experiments of samples with different  $\alpha$  values (see  
60 Table S1) were fitted using the Power Law model; the data from ZIF-8 suspension, instead, was fitted  
61 using the Herschel-Bulkley model. The results are shown in Figure S8.

62 *Table S1. Composition of the samples analysed in Figure S8, highlighting the volume fractions of CNCs ( $v_c$ ) and ZIF-8 ( $v_z$ ), in*  
63 *place of the mass fraction values, and the resulting parameters of the rheology data fit with the Herschel-Bulkley model ( $\sigma =$*   
64  *$\sigma_y + K\dot{\gamma}^n$ ) or Power Law ( $\sigma = K\dot{\gamma}^n$ ).*

| Sample                 | $v_c$ [%] | $v_z$ [%] | $\sigma_y$ [Pa] | $K$ [Pa·s <sup>n</sup> ] | $n$  |
|------------------------|-----------|-----------|-----------------|--------------------------|------|
| CNC $w_{5.19}$         | 3         | 0         | -               | 1.38                     | 0.42 |
| $\alpha_{0.1} w_{4.9}$ | 2.74      | 0.27      | -               | 0.73                     | 0.49 |
| $\alpha_{0.2} w_{4.7}$ | 2.50      | 0.50      | -               | 0.21                     | 0.60 |
| $\alpha_1 w_{3.9}$     | 1.50      | 1.50      | -               | 0.046                    | 0.70 |
| $\alpha_5 w_{3.1}$     | 0.50      | 2.50      | -               | 0.0029                   | 0.94 |
| $\alpha_{10} w_{2.9}$  | 0.27      | 2.74      | -               | 0.0019                   | 0.98 |
| ZIF-8 $w_{2.7}$        | 0         | 3         | 0.021           | 0.0028                   | 0.91 |

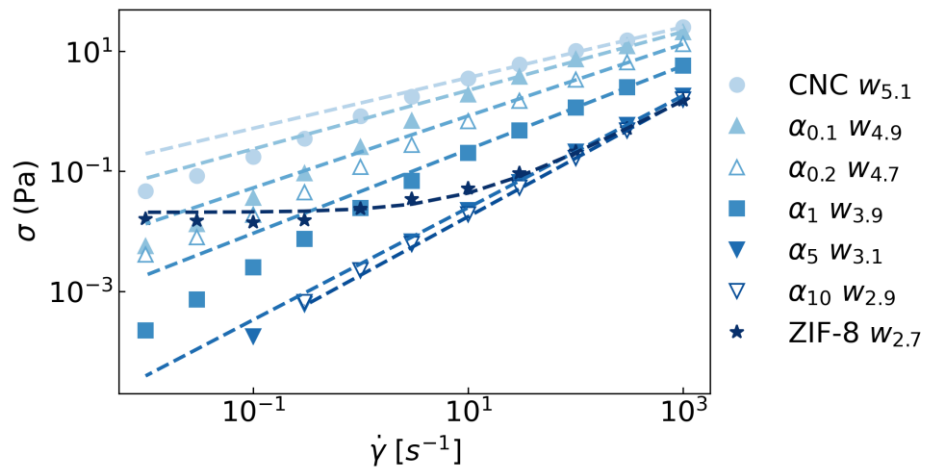

66

67 *Figure S8. Stress vs. shear rate plots of CNC, ZIF-8, and mixed CNC:ZIF-8 suspensions at different  $\alpha$  values. The dashed lines*  
 68 *represent the Herschel-Bulkley fit (for ZIF-8) and Power Law fit.*

69 The appearance of ZIF-8 and CNCs suspensions during shearing was investigated by rheo-optical  
 70 methods by coupling a digital camera to the rheometer (Figure S9).

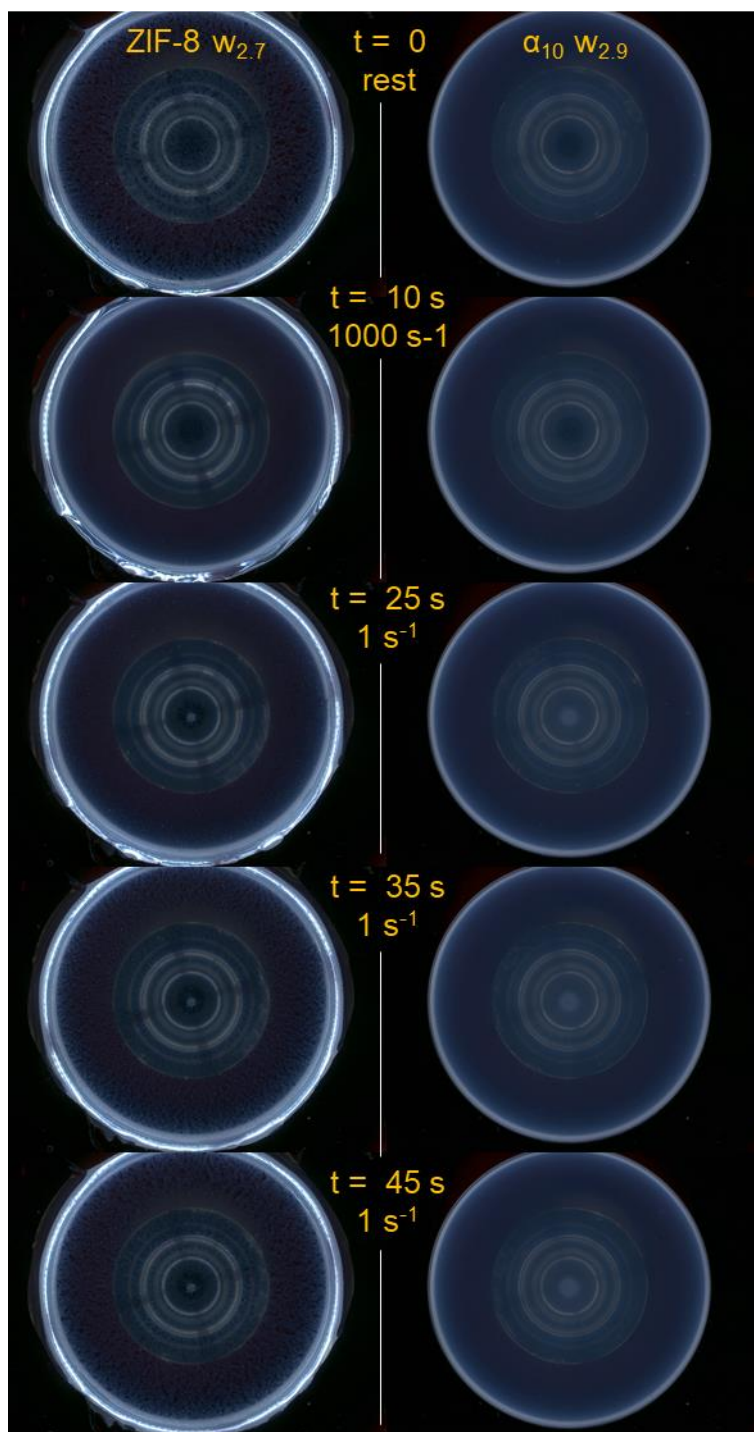

71

72 *Figure S9. Rheo-optical images of sheared ZIF-8 w<sub>2.7</sub> suspension (left column) and  $\alpha_{10}$  w<sub>2.9</sub> (right column) with the same volume*  
 73 *fraction ( $\phi=0.03$ ). The shear values and duration are reported in the figure. It can be seen that the ZIF-8 suspension starts*  
 74 *forming a percolated network between 25 and 35s, whereas sample  $\alpha_{10}$  w<sub>2.9</sub> did not exhibit any change.*

75 The azimuthally-averaged scattering intensity at a specific  $q$  value can be used to measure the increase  
 76 of particles mass concentration during filtration (Pignon et al., 2012; Semeraro et al., 2020). In this  
 77 work, the intensity at  $q=1 \text{ nm}^{-1}$  was chosen, as the scattering intensity at this value was not affected  
 78 by the variation of the structure factor  $S(q)$  with the samples' concentration. The evolution of  $I(q=1$   
 79  $\text{nm}^{-1})$  during the filtration of a  $\alpha_1$  w<sub>3</sub> suspension is shown in Figure S10.

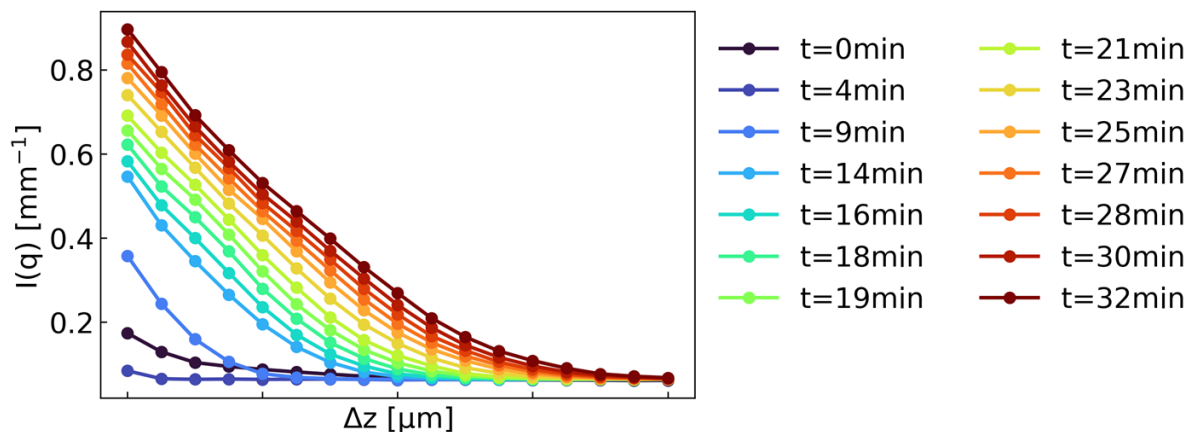

80

81 Figure S10. Evolution of the azimuthally-averaged scattering intensity at  $q = 1 \text{ nm}^{-1}$  of a  $\alpha_1 w_3$  suspension during frontal  
 82 filtration, measured *in situ* with SAXS.

83 Figure S11 shows the 2D scattering intensities collected during the *in situ* filtration of the sample  $\alpha_1$   
 84  $w_3$ , as a function of time (y axis) and distance from the support membrane (x axis). These patterns  
 85 were also used to compute the anisotropy level with the software SASET (Muthig et al., 2013).

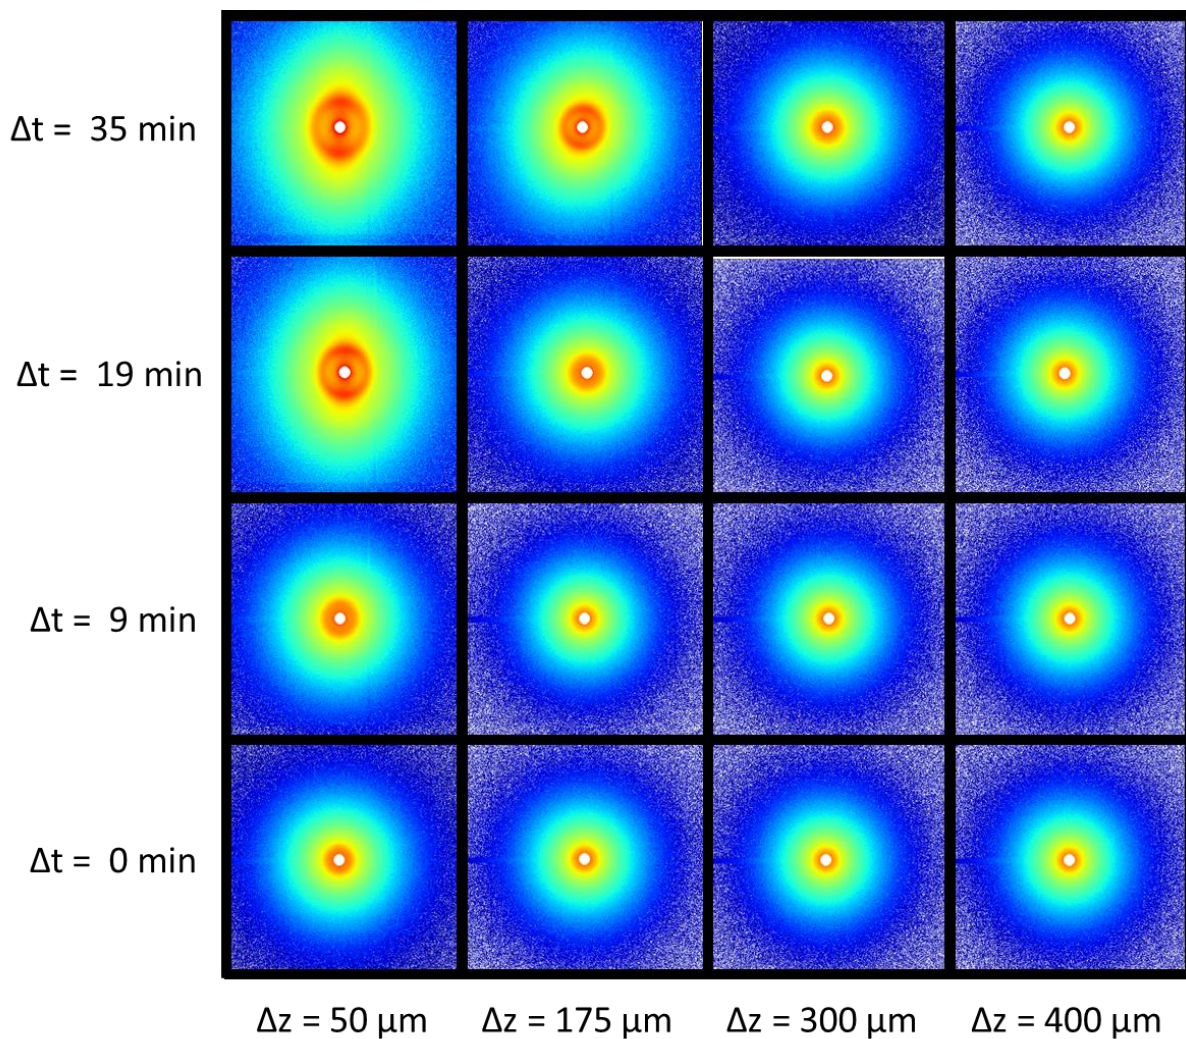

86

87 Figure S11. 2D scattering patterns acquired during the *in situ* SAXS filtration of a  $\alpha_1 w_3$  suspension, as a function of time (y  
 88 axis) and distance from the membrane (x axis) distances.

89 The *ex situ* filtration deposit was prepared from a  $\alpha_1W_{1.4}$  suspension for 72 h and analysed later at  
 90 TRUSAXS (ESRF, Grenoble) without removing the sample from the filtration cell. The suspension  
 91 contained 0.92 wt. % CNCs and 0.48 wt. % ZIF-8 (Figure S12).

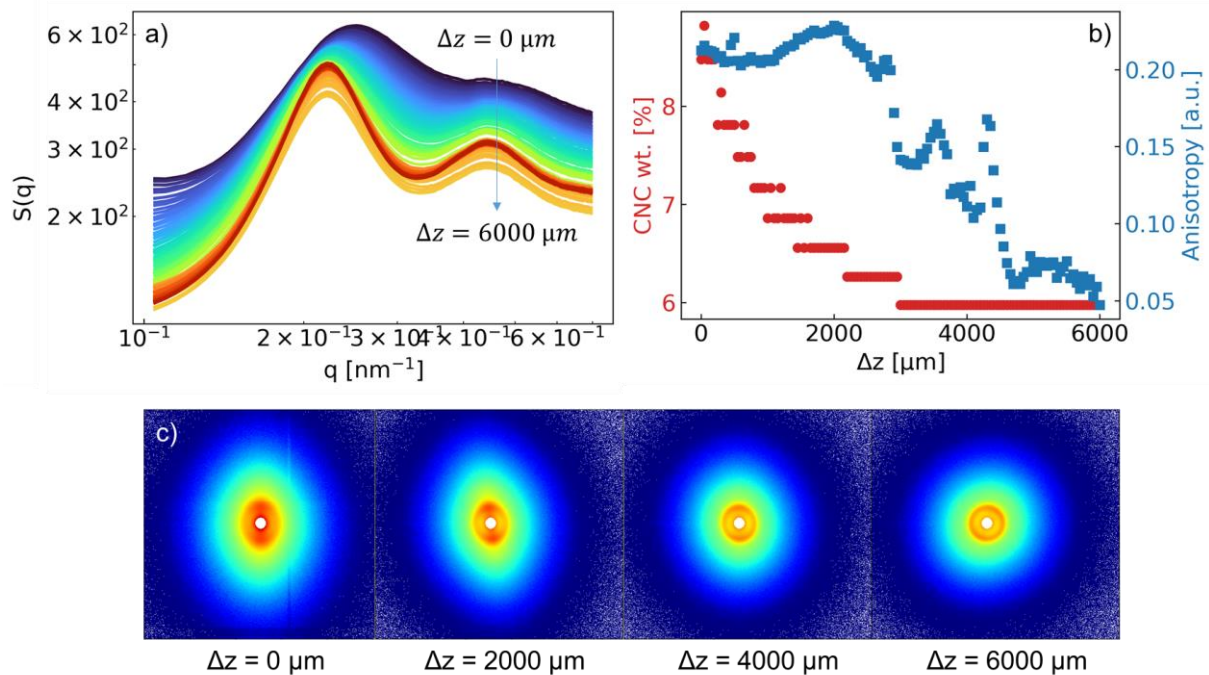

92

93 Figure S12. Structure factor  $S(q)$  the filtration deposit (a), calculated concentration of CNC from structure factor and  
 94 scattering anisotropy (b), 2D scattering patterns at selected distances from the membrane (c).

95 Finally, thermogravimetric analysis (TGA) was performed to confirm the mass ratio between the  
 96 CNCs and ZIF-8 in the filtration deposits (Figure S13).

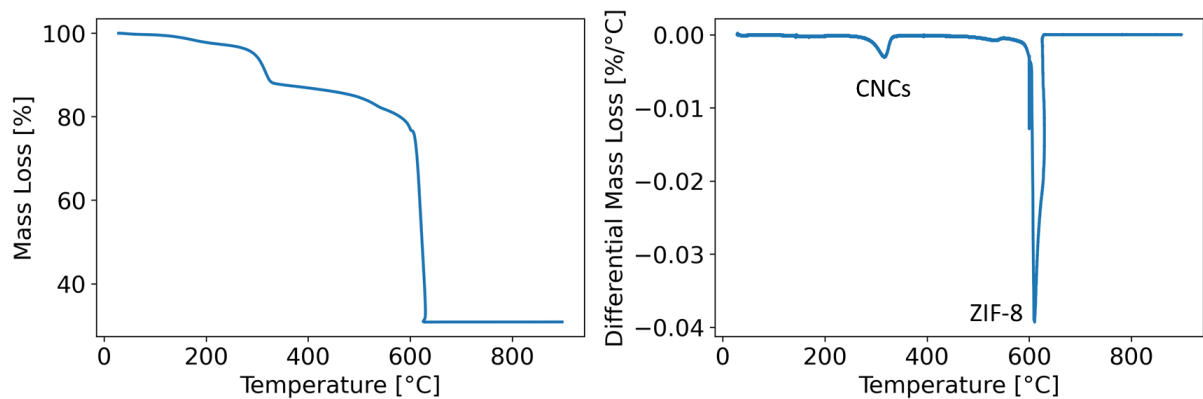

97

98 Figure S13. Thermogravimetric analysis of a  $\alpha_{10}$  filtration dried deposit, obtained after 48h of frontal filtration. The differential  
 99 mass loss curve (right) shows the peak belonging to the degradation of CNCs around 300 $^{\circ}\text{C}$ , and a further peak at ca. 600 $^{\circ}\text{C}$ ,  
 100 which relates to ZIF-8 degradation. The ratio between the area under the curve of the two integration peaks confirmed that  
 101 the sample contained 1:10 CNC:ZIF-8 volume ratio.

## 102 Bibliography

103 Almasoudi, A., & Mokaya, R. (2012). Preparation and hydrogen storage capacity of templated and

104 activated carbons nanocast from commercially available zeolitic imidazolate framework. *J.*

105 *Mater. Chem.*, 22(1), 146–152. <https://doi.org/10.1039/C1JM13314D>



106 Muthig, M., Prévost, S., Orglmeister, R., & Gradzielski, M. (2013). SASET: A program for series analysis  
107 of small-angle scattering data. *Journal of Applied Crystallography*, 46(4), 1187–1195.  
108 <https://doi.org/10.1107/S0021889813016658>

109 Pignon, F., Abyan, M., David, C., Magnin, A., & Sztucki, M. (2012). In Situ Characterization by SAXS of  
110 Concentration Polarization Layers during Cross-Flow Ultrafiltration of Laponite Dispersions.  
111 *Langmuir*, 28(2), 1083–1094. <https://doi.org/10.1021/la201492z>

112 Semeraro, E. F., Hengl, N., Karrouch, M., Michot, L. J., Paineau, E., Jean, B., Putaux, J.-L., Lancelon-Pin,  
113 C., Sharpnack, L., & Pignon, F. (2020). Layered organization of anisometric cellulose  
114 nanocrystals and beidellite clay particles accumulated near the membrane surface during  
115 cross-flow ultrafiltration: In situ SAXS and ex situ SEM/WAXD characterization. *Colloids and*  
116 *Surfaces A: Physicochemical and Engineering Aspects*, 584, 124030.  
117 <https://doi.org/10.1016/j.colsurfa.2019.124030>

118  
119
